# Supplementary material for: Evaluating the interfacial reaction kinetics of the bipolar membrane interface in the bipolar membrane fuel cell
Source: Royal Society of Chemistry journal article supplement (doi:10.1039/c3cp52150h), 2013-01-01
Supplement: c3cp52150h.pdf [file c3cp52150h.pdf]

Supporting Information for

**Evaluating the interfacial reaction kinetics of the bipolar membrane  
interface in the bipolar membrane fuel cell**

Sikan Peng,<sup>a</sup> Shanfu Lu,<sup>a</sup> Jin Zhang,<sup>a</sup> Pang-Chieh Sui,<sup>b</sup> Yan Xiang<sup>\*a</sup>

<sup>a</sup>*Key Laboratory of Bio-Inspired Smart Interfacial Science and Technology of Ministry of Education, School of Chemistry & Environment, Beihang University, Beijing 100191, PR China.*

<sup>b</sup>*Institute for Integrated Energy Systems, Department of Mechanical Engineering, University of Victoria, Victoria BC, Canada.*

\*To whom correspondence should be addressed. E-mail: [xiangy@buaa.edu.cn](mailto:xiangy@buaa.edu.cn)

## Experiment

Table S1 The physical properties of sQAPSF and Nafion membranes under room temperature.

| Properties                                                 | sQAPSF                                  | Nafion                 |
|------------------------------------------------------------|-----------------------------------------|------------------------|
| Functional group                                           | $-\text{N}^+(\text{CH}_3)_3\text{OH}^-$ | $-\text{SO}_3\text{H}$ |
| conductivity ( $\sigma$ , $\text{mS}\cdot\text{cm}^{-1}$ ) | 23.0                                    | 45.0                   |
| Swelling ratio (%)                                         | 3.00                                    | 23.0                   |
| IEC ( $\text{mmol}\cdot\text{g}^{-1}$ )                    | 1.34                                    | 0.90                   |
| density ( $\rho$ , $\text{g}\cdot\text{cm}^{-3}$ )         | 1.10                                    | 1.87                   |

The electrodes were made by a conventional thin hydrophilic electrode method consisting of painting a catalyst ink onto carbon paper. The ink for PEM (low-pH) electrode was prepared by mixing a Nafion solution (10 wt%), Pt/C catalyst (50 wt%, E-TEK), isopropyl alcohol, and pure water, while the ink for AEM (high-pH) electrode was a mixture of sQAPSF solution (2.0 wt%) and Pt/C catalyst (50 wt%, E-TEK). The inks were sonicated for 30 min and then cast onto Toray carbon paper (TGP-H-060) with gas diffusion layer and dried at 40 °C. The Pt loading for both PEM and AEM electrodes were 0.5  $\text{mg}\cdot\text{cm}^{-2}$ . Then, the AEM electrodes were immersed in aqueous 1.0 M KOH solution to exchange  $\text{Cl}^-$  into  $\text{OH}^-$  in the alkaline ionomer. Finally, 50  $\mu\text{L}$  of sQAPSF solution (2.0 wt%) was sprayed onto the AEM electrodes and dried at 40 °C for 30 minutes. The BPMFC MEAs were assembled into two steps. First, the PEM electrode was hot pressed with pretreated Nafion 212 membrane at 135 °C and 4 MPa for 90 s. Then, the AEM electrode was pressed with as-synthesized MEA at room temperature and 4 MPa for 180 s.

## Model description

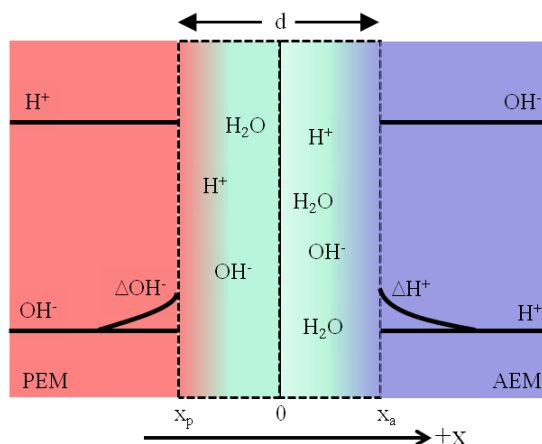

Scheme S1 Schematic of the bipolar membrane interface.

### Diffusion current density ( $i_{dif}$ )

The wide of depletion region on each side in the interface <sup>1</sup>:

$$d_a = \frac{N_p d}{N_a + N_p},$$

$$d_p = \frac{N_a d}{N_a + N_p} \quad (S1)$$

At the PEM/SCR boundary ( $x_p = -d_p$ ), the concentration of hydroxide ions and its variation can be expressed as:

$$c_{OH}(x_p) = c_{OH}^{PEM} \exp\left(\frac{q\eta}{kT}\right) \quad (S2)$$

$$\Delta c_{OH}(x_p) = c_{OH}(x_p) - c_{OH}^{PEM} \quad (S3)$$

In the same way, the concentration of proton and its variation at the SCR/AEM boundary ( $x_a = d_a$ ) are:

$$c_H(x_a) = c_H^{AEM} \exp\left(\frac{q\eta}{kT}\right) \quad (S4)$$

$$\Delta c_H (x_a) = c_H (x_a) - c_H^{AEM} \quad (S5)$$

The diffusion current density can be expressed as:

$$i_{dif} = F \left[ D_{OH} \frac{\Delta c_{OH} (x_p)}{L_{OH}} + D_H \frac{\Delta c_H (x_a)}{L_H} \right] \quad (S6)$$

where  $D_H, D_{OH}$  are the diffusion coefficients of proton and hydroxide ions in membranes,  $L_H, L_{OH}$  are the diffusion lengths. Moreover, the diffusion length  $L$  of  $H^+/OH^-$  is determined by the decay time ( $\tau$ ) as  $L = \sqrt{D\tau}$ . For the reaction (1) under the  $\varphi_{eq}$ , the rate of water formation ( $v_f^0 = k_f c_H^0 c_{OH}^0$ ,  $k_f$  is rate constant for water formation) is equal to the rate of water dissociation ( $v_d^0$ ). It assumed that the rate of water dissociation in the membranes hardly alters. Hence,

$$v_d = v_d^0 = v_f^0 \quad (S7)$$

Then the net reaction rate ( $v$ ) can be expressed as:

$$v = v_f - v_d = k_f (c_H c_{OH} - c_H^0 c_{OH}^0) \quad (S8)$$

with  $c_H = c_H^0 + \Delta c_H$ ,  $c_{OH} = c_{OH}^0 + \Delta c_{OH}$  and  $\Delta c_H = \Delta c_{OH}$  according to the electroneutral conditions. Thus the Eq. S8 can be derived into:

$$v = k_f (c_H^0 + c_{OH}^0 + \Delta c_{OH}) \Delta c_{OH} = \frac{\Delta c_{OH}}{\tau} \quad (S9)$$

with the decay time  $\tau = 1/k_f (c_H^0 + c_{OH}^0 + \Delta c_{OH})$ .

In the PEM, as  $c_H^0 \gg c_{OH}^0$ ,  $\Delta c_{OH}$  is valid, then the decay time of  $OH^-$  in PEM is:

$$\tau_{\text{PEM}} = \frac{1}{k_f c_H^0} = \frac{1}{k_f c_H^{\text{PEM}}} \quad (\text{S10})$$

In the AEM  $c_{OH}^0 \gg c_H^0, \Delta c_H$  is valid, then the decay time of  $H^+$  in AEM is:

$$\tau_{\text{AEM}} = \frac{1}{k_f c_{OH}^0} = \frac{1}{k_f c_{OH}^{\text{AEM}}} \quad (\text{S11})$$

Therefore, the diffusion lengths are obtained.

$$L_{OH} = \sqrt{D_{OH} \tau_{\text{PEM}}},$$

$$L_H = \sqrt{D_H \tau_{\text{AEM}}} \quad (\text{S12})$$

Then the diffusion current density in the BPM interface can be obtained by combining the Eq. S3,S5,S6 and S10~S12, yielding:

$$i_{\text{diff}} = F \sqrt{k_f} \left[ \exp\left(\frac{q\eta}{kT}\right) - 1 \right] \left[ \sqrt{D_{OH} c_H^{\text{PEM}} c_{OH}^{\text{PEM}}} + \sqrt{D_H c_{OH}^{\text{AEM}} c_H^{\text{AEM}}} \right] \quad (\text{S13})$$

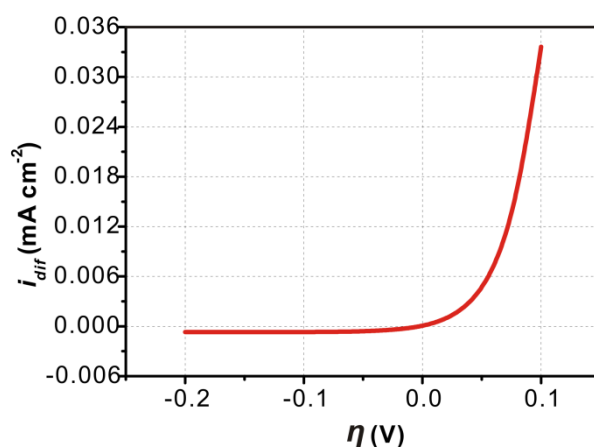

Fig. S1 Calculated diffusion current according to Eq. S13 with parameters in Table S1.

Positive value for water formation and negative for water dissociation

Table S2 Parameters used for simulation

| Parameters      | Value                                                       | Parameters            | Value                                                                     |
|-----------------|-------------------------------------------------------------|-----------------------|---------------------------------------------------------------------------|
| $q$             | $1.60 \times 10^{-19} \text{ C}$                            | $IEC_p$               | $0.90 \text{ mmol} \cdot \text{g}^{-1}$                                   |
| $k$             | $1.38 \times 10^{-23} \text{ J} \cdot \text{K}^{-1}$        | $IEC_a$               | $1.34 \text{ mmol} \cdot \text{g}^{-1}$                                   |
| $\varepsilon_0$ | $8.85 \times 10^{-14} \text{ F} \cdot \text{cm}^{-1}$       | $\rho_p$              | $1.87 \text{ g} \cdot \text{cm}^{-3}$                                     |
| $N_A$           | $6.02 \times 10^{23} \text{ mol}^{-1}$                      | $\rho_a$              | $1.10 \text{ g} \cdot \text{cm}^{-3}$                                     |
| $F$             | $96485 \text{ C} \cdot \text{mol}^{-1}$                     | $D_H^a$               | $1.20 \times 10^{-5} \text{ cm}^2 \cdot \text{s}^{-1}$                    |
| $\varepsilon_r$ | $35^1$                                                      | $D_{OH}^a$            | $6.13 \times 10^{-6} \text{ cm}^2 \cdot \text{s}^{-1}$                    |
| $R$             | $8.314 \text{ J} \cdot \text{K}^{-1} \cdot \text{mol}^{-1}$ | $c_H^{\text{PEM}}$    | $1.00 \text{ mol} \cdot \text{L}^{-1}$                                    |
| $\Delta G$      | $79.89 \text{ kJ} \cdot \text{mol}^{-1}$                    | $c_{OH}^{\text{AEM}}$ | $1.00 \text{ mol} \cdot \text{L}^{-1}$                                    |
| $T$             | $298.15 \text{ K}$                                          | $k_f^b$               | $8.00 \times 10^{15} \text{ L} \cdot \text{mol}^{-1} \cdot \text{s}^{-1}$ |

<sup>a</sup>The diffusion coefficient  $D$  was estimated using the conductivity ( $\sigma$ ) of membranes through considering the molar conductivity ( $\Lambda$ ) and the Einstein relationship. It

expressed as  $D \approx \frac{kT}{qcF} \sigma$ .

<sup>b</sup>The forward reaction constant  $k_f$  was obtained by model fitting, which could be different with different membrane systems.

**Reaction current density ( $i_{\text{reac}}$ )**

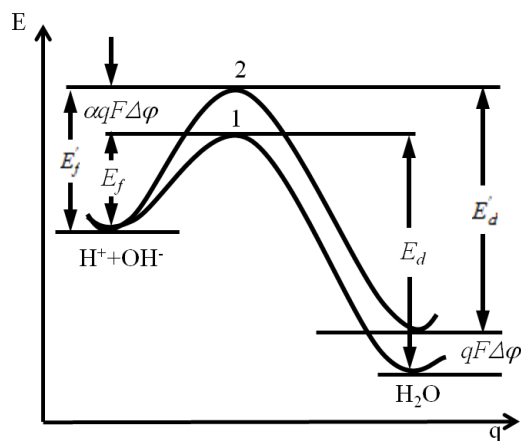

Fig. S2 Energy diagram of the water formation/dissociation reaction.

The forward and reverse reaction rates of reaction (1):

$$v_f = A_f c_H c_{OH} \exp\left(-\frac{E_f}{kT}\right) = k_f c_H c_{OH},$$

$$v_d = A_d c_{H_2O} \exp\left(-\frac{E_d}{kT}\right) = k_d c_{H_2O} \quad (\text{S14})$$

with  $A_f$ ,  $A_d$  are the pre-exponential factors.

When the reaction system of reaction (1) is influenced by a potential difference of  $\Delta\varphi$ , the overall activation barriers and their dependence on the potential difference are derived based on the energy diagram shown in Fig. S2. Hence,

$$E_f^* = E_f + \alpha q \Delta \varphi,$$

$$E_d^* = E_d - (1 - \alpha) q \Delta \varphi \quad (\text{S15})$$

where  $\alpha$  is the symmetry factor (transfer coefficient).

Then the reaction rate for forward and backward reactions and the net reaction rate are derived to be

$$v_f = A_f c_H c_{OH} \exp\left(-\frac{E_f'}{kT}\right) = k_f c_H c_{OH} \exp\left(-\frac{\alpha F \Delta \varphi}{RT}\right),$$

$$v_d = A_d c_{H_2O} \exp\left(-\frac{E_d'}{kT}\right) = k_d c_{H_2O} \exp\left[\frac{(1-\alpha)F \Delta \varphi}{RT}\right] \quad (\text{S16})$$

$$v = v_f - v_d = k_f c_H c_{OH} \exp\left(-\frac{\alpha F \Delta \varphi}{RT}\right) - k_d c_{H_2O} \exp\left[\frac{(1-\alpha)F \Delta \varphi}{RT}\right] \quad (\text{S17})$$

In equilibrium, net reaction rate  $v$  is zero. That is,  $v_f = v_d$

$$\Delta \varphi_{eq} = \frac{RT}{F} \ln \frac{k_f c_H c_{OH}}{k_d c_{H_2O}} \quad (\text{S18})$$

Under standard equilibrium potential, the  $\Delta \varphi_{eq} = 0$ , thus

$$k_d c_{H_2O} = k_f K_w \quad (\text{S19})$$

In the BPMFC, we can apply the interfacial overpotential, the activation overpotential

$\eta$  ( $\eta = \Delta \varphi_{eq} - \Delta \varphi$ ) rather than  $\Delta \varphi$ . This is the “extra voltage” which drives the

reaction current. In terms of overpotential, the reaction rate is

$$v = k_f c_H c_{OH} \exp\left[-\frac{\alpha F (\Delta \varphi_{eq} - \eta)}{RT}\right] - k_d c_{H_2O} \exp\left[\frac{(1-\alpha)F (\Delta \varphi_{eq} - \eta)}{RT}\right] \quad (\text{S20})$$

Using Eq. S18, it yields

$$v = k_f c_H c_{OH} \left(\frac{k_f c_H c_{OH}}{k_d c_{H_2O}}\right)^{-\alpha} \exp\left[\frac{\alpha F \eta}{RT}\right] - k_d c_{H_2O} \left(\frac{k_f c_H c_{OH}}{k_d c_{H_2O}}\right)^{1-\alpha} \exp\left[-\frac{(1-\alpha)F \eta}{RT}\right] \quad (\text{S21})$$

Then combining Eq. S19, Eq. S21 and  $c_H c_{OH} = K_w \exp\left(\frac{q\eta}{kT}\right)$  with the assumption for

simplification that the water content in the BPM interface is saturated, thus



$$v = K_w k_f \exp\left[\frac{(1-\alpha)F\eta}{RT}\right] \left\{ \exp\left(\frac{\alpha F\eta}{RT}\right) - \exp\left[-\frac{(1-\alpha)F\eta}{RT}\right] \right\} \quad (\text{S22})$$

Therefore,

$$i_{\text{reac}} = Fvd = FdK_w k_f \exp\left[\frac{(1-\alpha)F\eta}{RT}\right] \left\{ \exp\left(\frac{\alpha F\eta}{RT}\right) - \exp\left[-\frac{(1-\alpha)F\eta}{RT}\right] \right\} \quad (\text{S23})$$

$$i_{\text{reac}} = i_0 \left\{ \exp\left(\frac{\alpha F\eta}{RT}\right) - \exp\left[-\frac{(1-\alpha)F\eta}{RT}\right] \right\} \quad \text{with: } i_0 = FdK_w k_f \exp\left[\frac{(1-\alpha)F\eta}{RT}\right]$$

i.e. to the Eq. 2 in the main text.

## Simulation

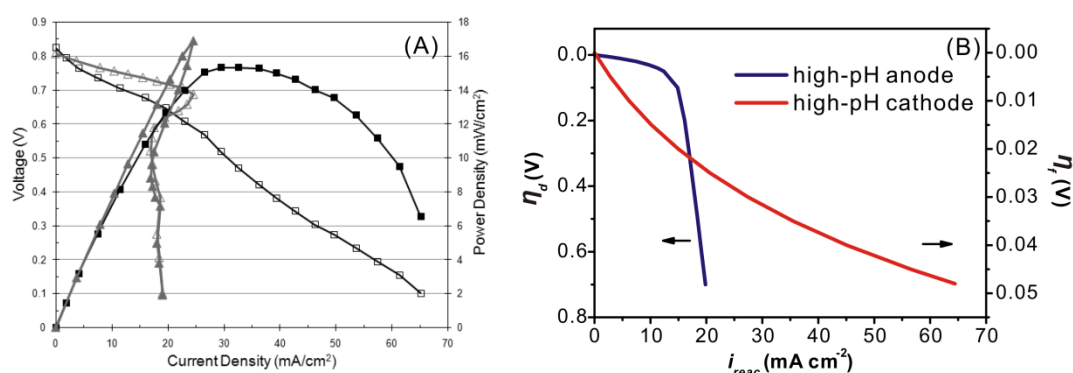

Fig. S3 (A) Polarization curves of a BPMFC by Ünlü *et al.*<sup>1</sup> Cells comprised with a high-pH anode ( $\Delta$ ) or a high-pH cathode ( $\square$ ) with a Nafion 212 membrane at 50 °C. Solid symbols correspond to the power density. (B) Model fitted polarization curves calculated with Eq. 2 by replacing the parameters of AEM properties and temperature in Table S2 with that applied by Ünlü *et al.* In this case, the  $k_f$  was estimated to be about  $5.0 \times 10^{15} \text{ L} \cdot \text{mol}^{-1} \cdot \text{s}^{-1}$ .

## Reference

1. M. Ünlü, J. F. Zhou and P. A. Kohl, *Journal of Physical Chemistry C*, 2009, **113**, 11416-11423.
